# Supplementary material for: A Systems Analysis of Phenotype Heterogeneity in APOE*3Leiden.CETP Mice Induced by Long-Term High-Fat High-Cholesterol Diet Feeding
Source: MDPI journal article supplement (doi:10.3390/nu14224936), 2022-11-21
Supplement: s1 [file s1]

### Suppl. S1: Finding appropriate settings within the ADAPT procedure for the model

The computational approach of ADAPT has been described previously (1). The method makes use of the fact that most physiological processes change relatively slowly over time, and that taking this into account in a computational model makes parameter estimation more accurate. Since the efficiency of the ADAPT procedure on achieving a good fit to the data is in part dependent on the regularization imposed by the  $\lambda$  parameter, we first tested whether for this model size and these number of constraints, a  $\lambda$  of 0.01 was appropriate. We therefore varied  $\lambda$  between  $10^{-5}$  and  $10^5$  and assessed the goodness-of-fit based on the sum of squares of the residual error. For every lambda, we repeated the procedure for 100 iterations. Every iteration used a different set of data splines, and the set of initial parameter values for every iteration was taken from a uniform distribution of the log-transformed linear space between  $10^4$  and  $10^{-4}$ . Between  $\lambda$ s however, iterations made use of the same data splines and set of initial parameter values, so that the effect of varying  $\lambda$  could be isolated. Iterations for which the optimizer failed to converge for one or multiple  $\lambda$  values were discarded. We then found that a  $\lambda$  value of 0.01 is indeed appropriate (**Figure S1**). To find out what number of time steps was appropriate, we used a  $\lambda$  of 0.01 and ran ADAPT for 100 iterations while varying the number of time steps between 2 and 1000. We then found that 200 time steps were appropriate (**Figure S2**). This set of initial parameters was then used for subsequent runs on the full time span, using a  $\lambda$  of 0.01 and 200 time steps. Finally, of results obtained in this way, the best 10% of a 1000 fits are displayed, unless stated otherwise.

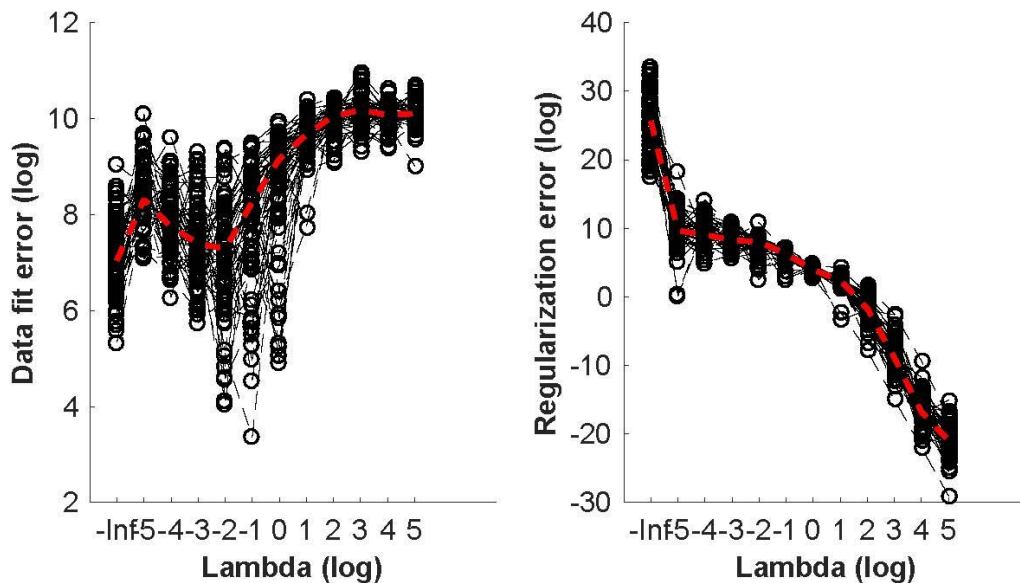

**Figure S1**

The data fit error and regularization error for different lambdas (logarithmic scale). Note that for lambda  $10^{-2}$ , the data fit error is small and the regularization error has dropped as well, while at larger lambdas decreasing regularization error occurs at the expense of the data fit.

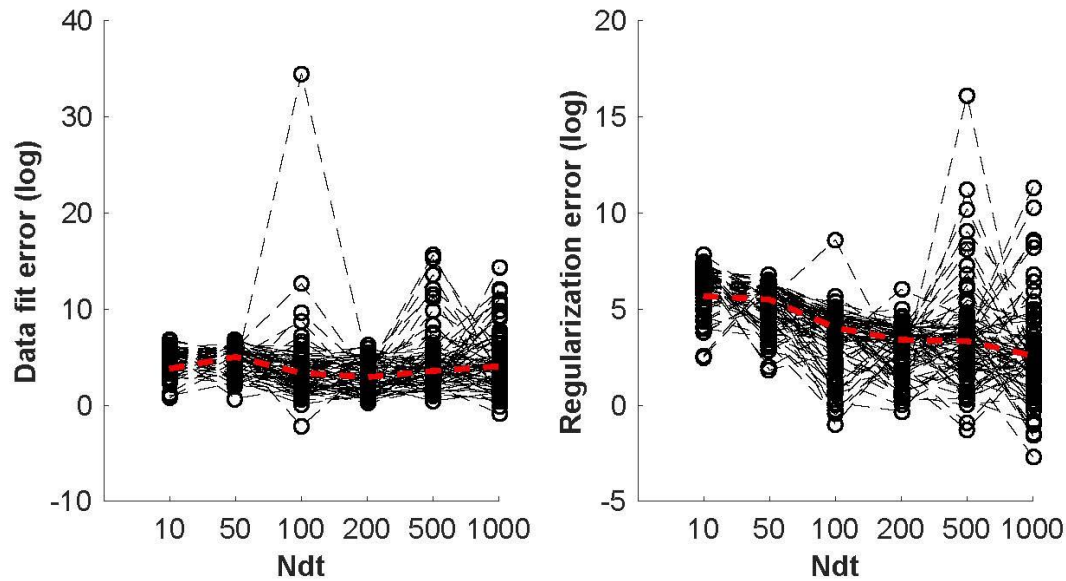

**Figure S2**

The Data fit error and regularization error for different amount of time steps. Note that there is little difference in data fit error for the different amount of time steps, while beyond 200 time steps the regularization error is not greatly decreased.

1. Tiemann, C. A., J. Vanlier, M. H. Oosterveer, A. K. Groen, P. A. J. Hilbers, and N. A. W. van Riel. 2013. Parameter trajectory analysis to identify treatment effects of pharmacological interventions. *PLoS Comput. Biol.* **9**: e1003166.

## Suppl. S2: Translation of Experimental Data to Modeling Constraints

Experimental data were used as constraints for the model in the following ways: The amount of peripheral fat was estimated by assuming a steady lean mass of 24 gram. The peripheral fat, expressed as  $\mu\text{mol TG}$ , was then approximated as,  $(\text{BW}-24)*850$ . To account for de novo lipogenesis, we assumed that the rate of de novo lipogenesis was equal to the amount of newly synthesized fatty acids calculated from the mass-isotopomer-distribution analysis during the labeling period. We further assumed that the composition of fatty acids within the liver did not change over time. Then, we determined the amount of newly synthesized triglyceride by taking the total of palmitate, oleate and stearate produced multiplied by 0.33, 0.62, and 0.05 respectively, according to the respective abundance of these fatty acids in the liver (1). Chain elongation was counted as  $1/9^{\text{th}}$  of a fatty acid newly synthesized. To account for the pools of plasma volume being dependent on the weight of the animals, we multiplied the measured concentration in the plasma with the theoretical plasma volume as derived from linear least-squares regression of plasma volume against body weight for obese mice, using the data from Yen et al. (1970) (2). We then arrive at the following relation :  $\text{Plasma Volume} = 0.0117 + 0.7704*\text{BW}$ . This relation was used to calculate VLDL-TG production as well. The lumenal content for cholesterol was constrained on the assumption that a mouse has 1 gram of feces. This was done so that the model would not inadvertently accumulate lumenal content, which would be unrealistic.

1. Oosterveer, M. H., T. H. van Dijk, U. J. F. Tietge, T. Boer, R. Havinga, F. Stellaard, A. K. Groen, F. Kuipers, and D.-J. J. Reijngoud. 2009. High fat feeding induces hepatic fatty acid elongation in mice. *PLoS One*. **4**: e6066.
2. Yen, T., J. Stienmetz, and P. J. Simpson. 1970. Blood Volume of Obese (ob/ob) and Diabetic (db/db) Mice (34462). *P.S.E.B.M.* **133**: 307–308.

### Suppl. S3: Model Description

Table S1: Description of Model States

| Symbol     | Description                      |
|------------|----------------------------------|
| Lum_TG     | Triglyceride in intestinal lumen |
| Lum_C      | Cholesterol in intestinal lumen  |
| Lum_BA     | Bile acids in intestinal lumen   |
| Pl_Gluc    | Plasma glucose                   |
| Pl_FFA     | Plasma free fatty acids          |
| Pl_VLDL_TG | Plasma VLDL-TG                   |
| Pl_VLDL_C  | Plasma VLDL-C                    |
| Pl_HDL_C   | Plasma HDL-C                     |
| Hep_G6P    | Hepatic glucose-6-phosphate      |
| Hep_AcoA   | Hepatic acetyl-CoA               |
| Hep_TG     | Hepatic triglycerides            |
| Hep_FC     | Hepatic free cholesterol         |
| Hep_CE     | Hepatic cholesterol ester        |
| Hep_BA     | Hepatic bile acids               |
| Per_G6P    | Peripheral glucose-6-phosphate   |
| Per_AcoA   | Peripheral acetyl-CoA            |
| Per_TG     | Peripheral triglycerides         |
| Per_C      | Peripheral cholesterol           |

Table S2: Description of Model Parameters

| Symbol       | Description                       |
|--------------|-----------------------------------|
| gluc_abs     | Intestinal glucose absorption     |
| glut_2       | Hepatic glucose absorption        |
| glut_134     | Peripheral glucose absorption     |
| hep_PFK      | Hepatic phosphofructokinase       |
| per_PFK      | Peripheral phosphofructokinase    |
| hep_AA       | Hepatic amino acids               |
| per_AA       | Peripheral amino acids            |
| g6pase       | Glucose-6-phosphatase             |
| fat_intake   | Dietary fat Intake                |
| hep_chyl_upt | Hepatic fat uptake                |
| per_chyl_upt | Peripheral fat uptake             |
| hep_LDLRf    | Hepatic LDLR                      |
| per_LDLRf    | Peripheral LDLR                   |
| hep_CPT1     | Hepatic fat oxidation             |
| per_CPT1     | Peripheral fat oxidation          |
| hep_CS       | Hepatic Krebs cycle               |
| per_CS       | Peripheral Krebs cycle            |
| hep_ACC      | Hepatic Acetyl CoA Carboxylase    |
| per_ACC      | Peripheral Acetyl CoA Carboxylase |

|                    |                                         |
|--------------------|-----------------------------------------|
| <b>hep_apob</b>    | VLDL-C production                       |
| <b>LPL</b>         | Lipoprotein Lipase                      |
| <b>HSL_ATGL</b>    | Peripheral lipolysis                    |
| <b>CD36</b>        | Hepatic free fatty acid uptake          |
| <b>chol_intake</b> | Dietary cholesterol intake              |
| <b>NPC1L1</b>      | Intestinal cholesterol Uptake           |
| <b>hep_HMGCR</b>   | Hepatic cholesterol synthesis           |
| <b>hep_ACAT</b>    | Hepatic cholesterol esterification      |
| <b>hep_CEH</b>     | Hepatic cholesterol ester hydrolyzation |
| <b>per_HMGCR</b>   | Peripheral cholesterol synthesis        |
| <b>CYP7A1</b>      | Bile acid synthesis                     |
| <b>ABCA1</b>       | HDL synthesis                           |
| <b>SRB1</b>        | HDL uptake                              |
| <b>PLTP</b>        | VLDL-TG production                      |
| <b>CETP</b>        | Cholesterol Ester Transfer Protein      |
| <b>pTICE</b>       | Transintestinal cholesterol excretion   |
| <b>BSEP</b>        | Biliary bile acid secretion             |
| <b>ABCG5</b>       | Biliary free cholesterol excretion      |
| <b>k_fec_exc</b>   | Fecal excretion rate                    |
| <b>k_reabsorb</b>  | Biliary reabsorption                    |

Table S3: Description of Model Fluxes

| <b>Legend</b> | <b>Symbol</b>  | <b>Description</b>                | <b>Rate Equation</b>  |
|---------------|----------------|-----------------------------------|-----------------------|
| <b>j1</b>     | Gluc_abs       | Glucose Absorption                | gluc_abs              |
| <b>j2</b>     | Hep_Gluc_upt   | Hepatic Glucose Uptake            | glut2 * Pl_Gluc       |
| <b>j3</b>     | Per_Gluc_upt   | Peripheral Glucose Uptake         | glut134 * Pl_Gluc     |
| <b>j4</b>     | Hep_glyc       | Hepatic Glycolysis                | hep_PFK * Hep_G6P     |
| <b>j5</b>     | Per_Glyc       | Peripheral Glycolysis             | per_PFK * Per_G6P     |
| <b>j6</b>     | Hep_AAglc      | Hepatic glucogenic amino acids    | 0.5 * hep_AA          |
| <b>j7</b>     | Per_AAglc      | Peripheral glucogenic amino acids | 0.5 * per_AA          |
| <b>j8</b>     | Hep_AAket      | Hepatic ketogenic Amino acids     | 0.5 * hep_AA          |
| <b>j9</b>     | Per_AAket      | Peripheral ketogenic Amino acids  | 0.5 * per_AA          |
| <b>j10</b>    | G6Pase         | Hepatic Glucose-6-Phosphatase     | g6pase * Hep_G6P      |
| <b>j11</b>    | Fat_intake     | Fat_intake                        | fat_intake            |
| <b>j12</b>    | Hep_chylTG_upt | Hepatic Chylomicron Uptake        | hep_chyl_upt * Lum_TG |
| <b>j13</b>    | Per_chylTG_upt | Peripheral Chylomicron Uptake     | per_chyl_upt * Lum_TG |
| <b>j14</b>    | HepTG_ox       | Hepatic Fat oxidation             | hep_CPT1 * Hep_TG     |
| <b>j15</b>    | PerTG_ox       | Peripheral Fat oxidation          | per_CPT1 * Per_TG     |
| <b>j16</b>    | hepKC          | Hepatic Krebs Cycle               | hep_CS * Hep_AcoA     |
| <b>j17</b>    | perKC          | Peripheral Krebs Cycle            | per_CS * Per_AcoA     |
| <b>j18</b>    | hepDNL         | Hepatic De novo lipogenesis       | hep_ACC * Hep_AcoA    |
| <b>j19</b>    | perDNL         | Peripheral De novo lipogenesis    | per_ACC * Per_AcoA    |
| <b>j20</b>    | VLDLTG prod    | VLDL TG production                | apoB * Hep_TG         |
| <b>j21</b>    | VLDLTG upt     | VLDL TG uptake                    | LPL * Pl_VLDL_TG      |
| <b>j21</b>    | Lipolysis      | Lipolysis                         | HSL_ATGL * Per_TG     |
| <b>j22</b>    | FFA_upt        | FFA uptake                        | CD36 * Pl_FFA         |

|            |                |                                        |                       |
|------------|----------------|----------------------------------------|-----------------------|
| <b>j24</b> | Chol_Intk      | Dietary Cholesterol Intake             | chol_intk             |
| <b>j25</b> | Remn_chol_upt  | Remnant Cholesterol Uptake             | NPC1L1 * Lum_C        |
| <b>j26</b> | Hep_cholsynt   | Hepatic Cholesterol Synthesis          | hep_HMGCR * Hep_AcoA  |
| <b>j27</b> | Hep_acat       | Hepatic acat activity                  | hep_ACAT * Hep_FC     |
| <b>j28</b> | Hep_ceh        | Hepatic CEH activity                   | hep_CEH * Hep_CE      |
| <b>j29</b> | Per_cholsynt   | Peripheral Cholesterol Synthesis       | per_HMGCR * Per_AcoA  |
| <b>j30</b> | BA_synth       | Bile Acid Synthesis                    | CYP7A1 * Hep_FC       |
| <b>j31</b> | HDLC_prod      | HDLC production                        | ABCA1 * Per_C         |
| <b>j32</b> | HDLC_upt       | HDLC uptake                            | SRB1 * Pl_HDL_C       |
| <b>j33</b> | VLDLC_prod     | VLDLC production                       | PLTP * Hep_CE         |
| <b>j12</b> | Hep_LDLupt     | Hepatic LDL uptake                     | hep_LDLRf * Pl_VLDL_C |
| <b>j13</b> | Per_LDLupt     | Peripheral LDL uptake                  | per_LDLRf * Pl_VLDL_C |
| <b>j34</b> | CETP           | CETP-activity                          | pCETP * Pl_VLDL_TG    |
| <b>j35</b> | TICE           | Trans-Intestinal Cholesterol Excretion | pTICE * Pl_VLDL_C     |
| <b>j36</b> | BA_sec         | Bile Acid Secretion                    | BSEP * Hep_BA         |
| <b>j37</b> | Chol_sec       | Cholesterol secretion                  | ABCG5 * Hep_FC        |
| <b>j38</b> | FecTG_exc      | Fecal TG excretion                     | fec_exc * Lum_TG      |
| <b>j39</b> | FecC_exc       | Fecal Cholesterol excretion            | fec_exc * Lum_C       |
| <b>j40</b> | FecBA_exc      | Fecal BA excretion                     | fec_exc * Lum_BA      |
| <b>j41</b> | FecBA_reabsorb | Fecal BA reabsorption                  | reabsorb * Lum_BA     |

#### Model Equations:

- 1)  $dLUM\_TG/dt = Fat\_Intk - Hep\_ChylTG\_Upt - Per\_ChylTG\_Upt - FecTG\_exc$
- 2)  $dLUM\_C/dt = Chol\_Intk + TICE + Chol\_Sec - Remn\_Chol\_Upt - FecC\_exc$
- 3)  $dLUM\_BA/dt = BA\_sec - FecBA\_reabsorb - FecBA\_exc$
- 4)  $dPl\_GLUC/dt = Gluc\_abs - Hep\_Gluc\_Upt - Per\_Gluc\_Upt + G6pase$
- 5)  $dPl\_FFA/dt = 3 * Lipolysis - FFA\_upt$
- 6)  $dPl\_VLDL\_TG/dt = VLDLTG\_prod - VLDLTG\_upt$
- 7)  $dPl\_VLDL\_C/dt = VLDLC\_prod + CETP - hep\_LDLupt - per\_LDLupt - TICE$
- 8)  $dPl\_HDL\_C/dt = HDLC\_prod - HDLC\_upt - CETP$
- 9)  $dHep\_G6p/dt = Hep\_Gluc\_Upt + Hep\_AAglc - Hep\_glyc - G6pase$
- 10)  $dHep\_AcoA/dt = 2 * Hep\_glyc + 21.4 * HepTG\_ox + 2 * Hep\_AAket - HepKC - HepDNL - Hep\_cholsynt$
- 11)  $dHep\_TG/dt = Hep\_ChylTG\_Upt + FFA\_upt/3 + HepDNL/21.4 - HepTG\_ox - VLDLTG\_prod$

- 12) 
$$\text{dHep\_FC}/\text{dt} = \text{Remn\_Chol\_Upt} - \text{Chol\_Sec} + \text{Hep\_Cholsynt}/13.5 - \text{BA\_synt} - \text{Hep\_acat} + \text{Hep\_ceh}$$
- 13) 
$$\text{dHep\_CE}/\text{dt} = \text{Hep\_LDLupt} + \text{HDLC\_upt} - \text{VLDLC\_prod} + \text{Hep\_acat} - \text{Hep\_ceh}$$
- 14) 
$$\text{dHep\_BA}/\text{dt} = \text{BA\_synt} - \text{BA\_sec} + \text{FecBA\_reabsorb}$$
- 15) 
$$\text{dper\_G6P}/\text{dt} = \text{Per\_gluc\_upt} - \text{Per\_glyc} + \text{Per\_AAglc}$$
- 16) 
$$\text{dper\_AcoA}/\text{dt} = 2*\text{Per\_glyc} + 21.4*\text{PerTG\_ox} + 2*\text{Per\_AAket} - \text{PerKC} - \text{PerDNL} - \text{Per\_cholsynt}$$
- 17) 
$$\text{dVLDL\_TG\_upt}/\text{dt} = \text{VLDLTG\_upt} + \text{Per\_chylTG\_upt} + \text{PerDNL}/21.4 - \text{Lipolysis} - \text{PerTG\_ox}$$
- 18) 
$$\text{dVLDL\_C\_upt}/\text{dt} = \text{Per\_Cholsynt}/13.5 + \text{Per\_LDLupt} - \text{HDLC\_prod}$$

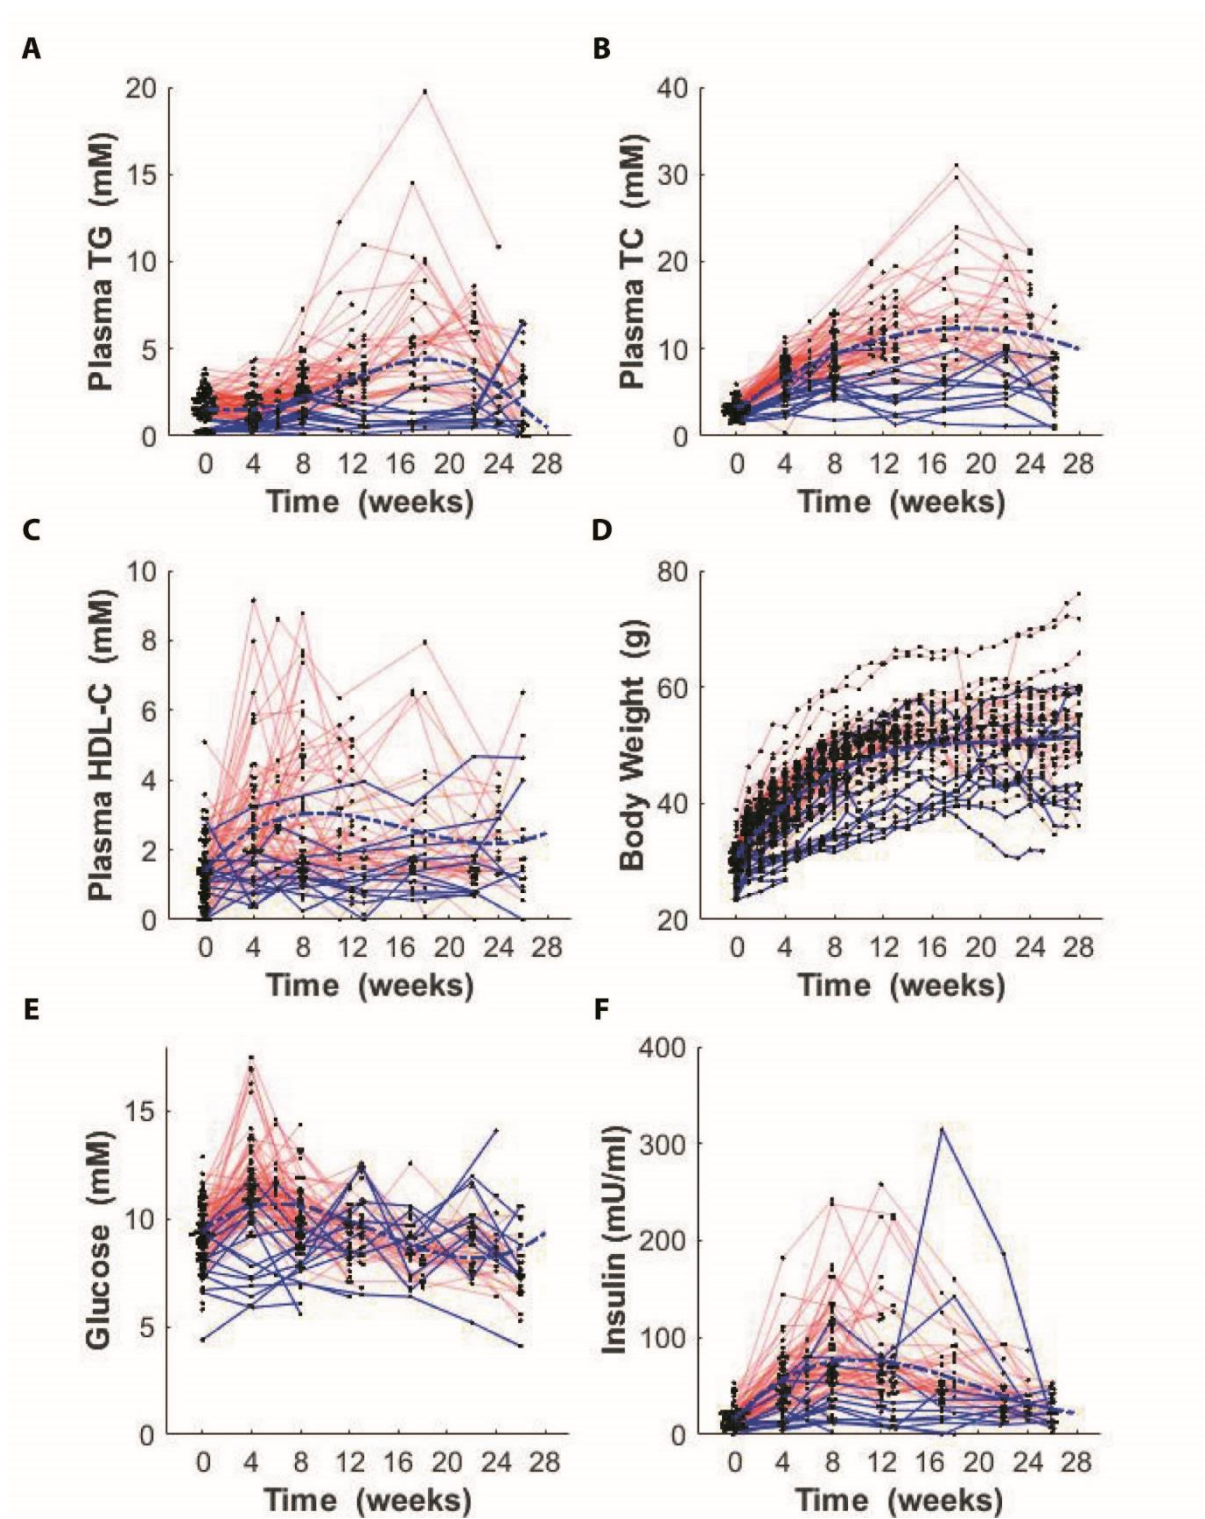

**Figure S3**

Responders are marked in red and non-responders are marked in blue. Note how low plasma TG in non-responders is accompanied by lower body weights and less insulin resistance.



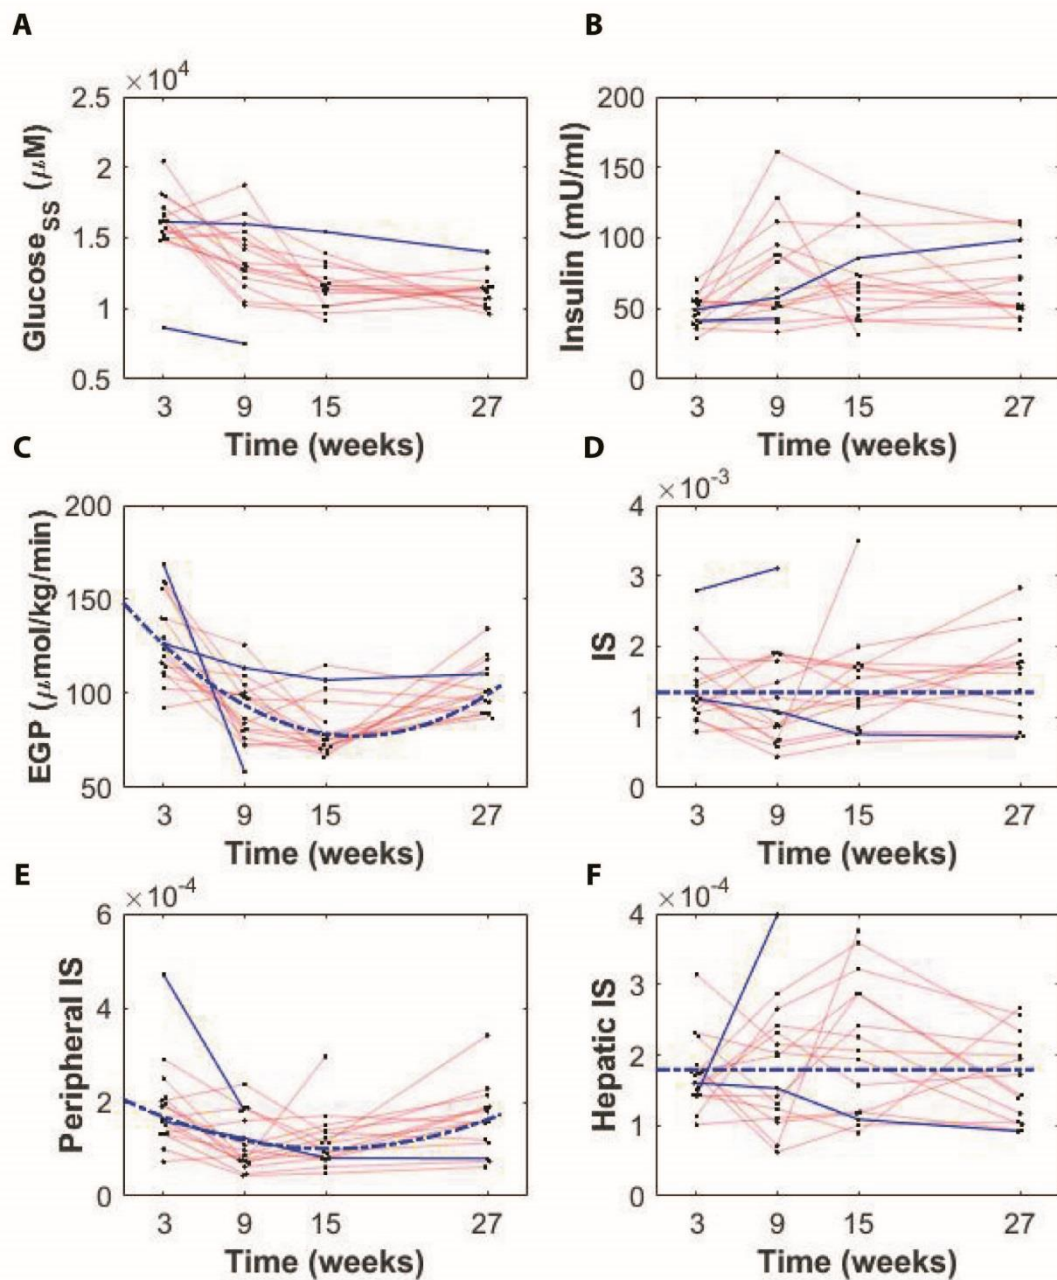

**Figure S4**

Evolution of insulin sensitivity of responders (red) and non-responders (blue) over the course of the experiment. One of the non-responders had to be terminated early because of a rapid decrease in body weight. The non-responder that had to be terminated early was marked by low insulin-resistance.

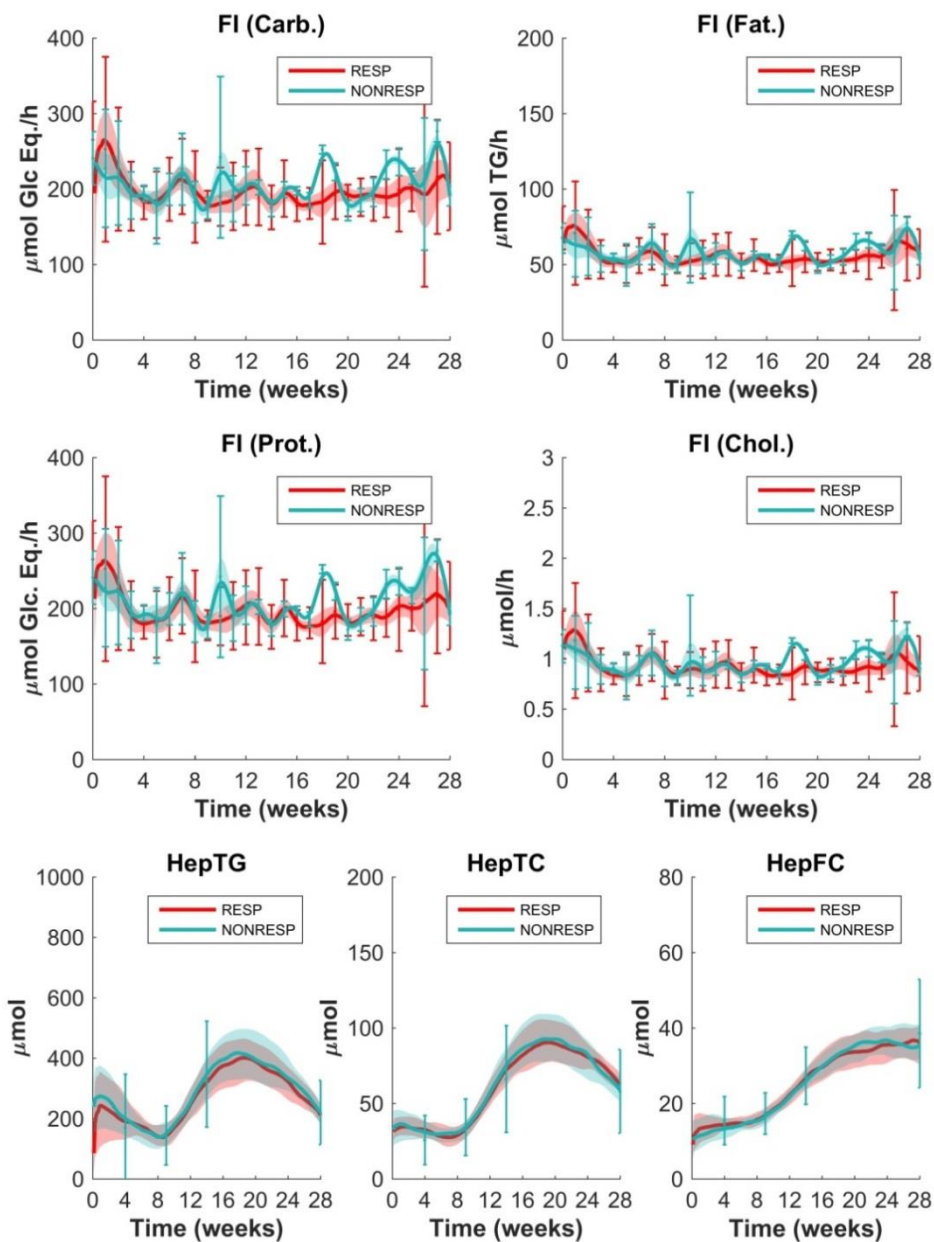

**Figure S5**

Simulation results for food intake (FI), hepatic TG (HepTG), total cholesterol (HepTC) and free cholesterol (HepFC). The curve represents the median values, whereas the area around the line denotes 30% of solutions around the median. Error bars denote the standard deviation of the experimental data.

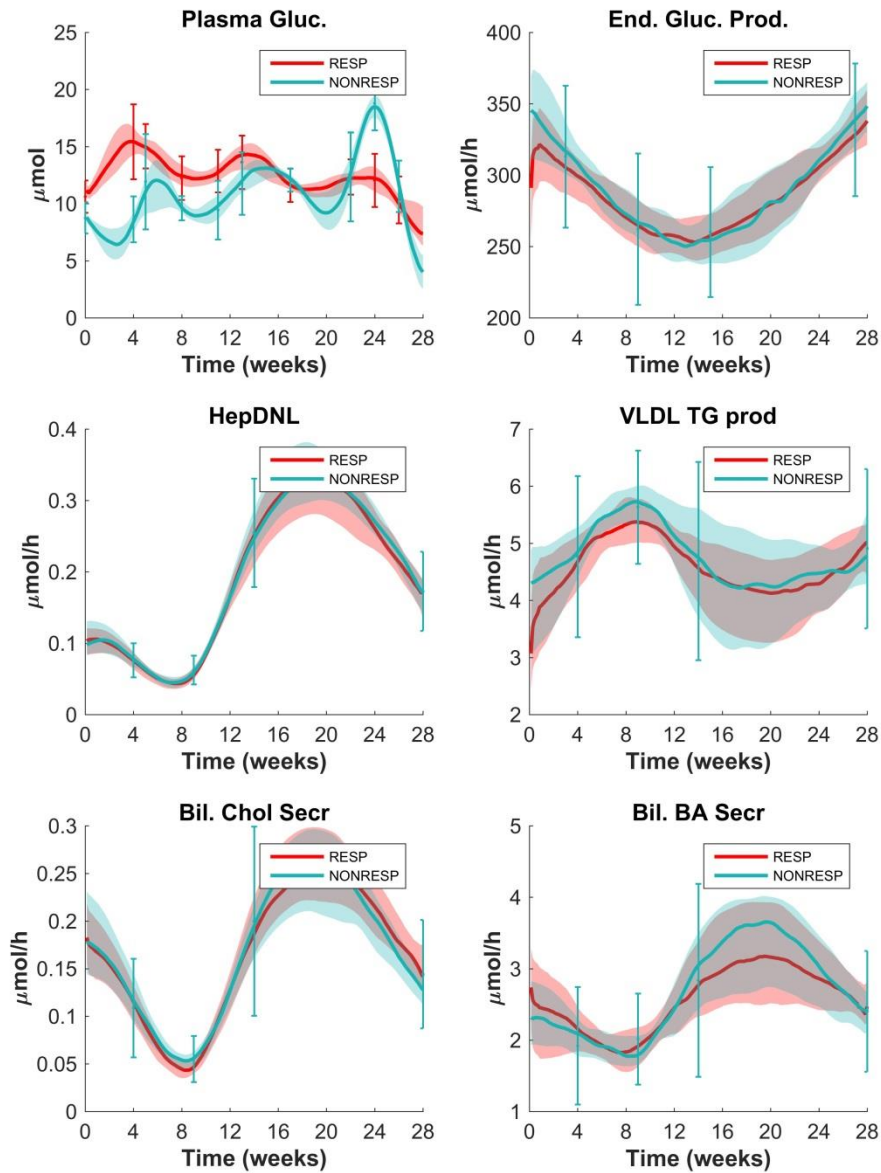

**Figure S6**

Simulation results for plasma glucose (Plasma Gluc.), endogenous glucose production (End. Gluc. Prod.), hepatic de novo lipogenesis (HepDNL), VLDL-TG production (VLDL TG prod) and biliary secretion of cholesterol (Bil. Chol Secr) and bile acids (Bil. BA Secr). The curve represents the median values, whereas the area around the curve denotes 30% of solutions around the median. Error bars denote the standard deviation of the experimental data.

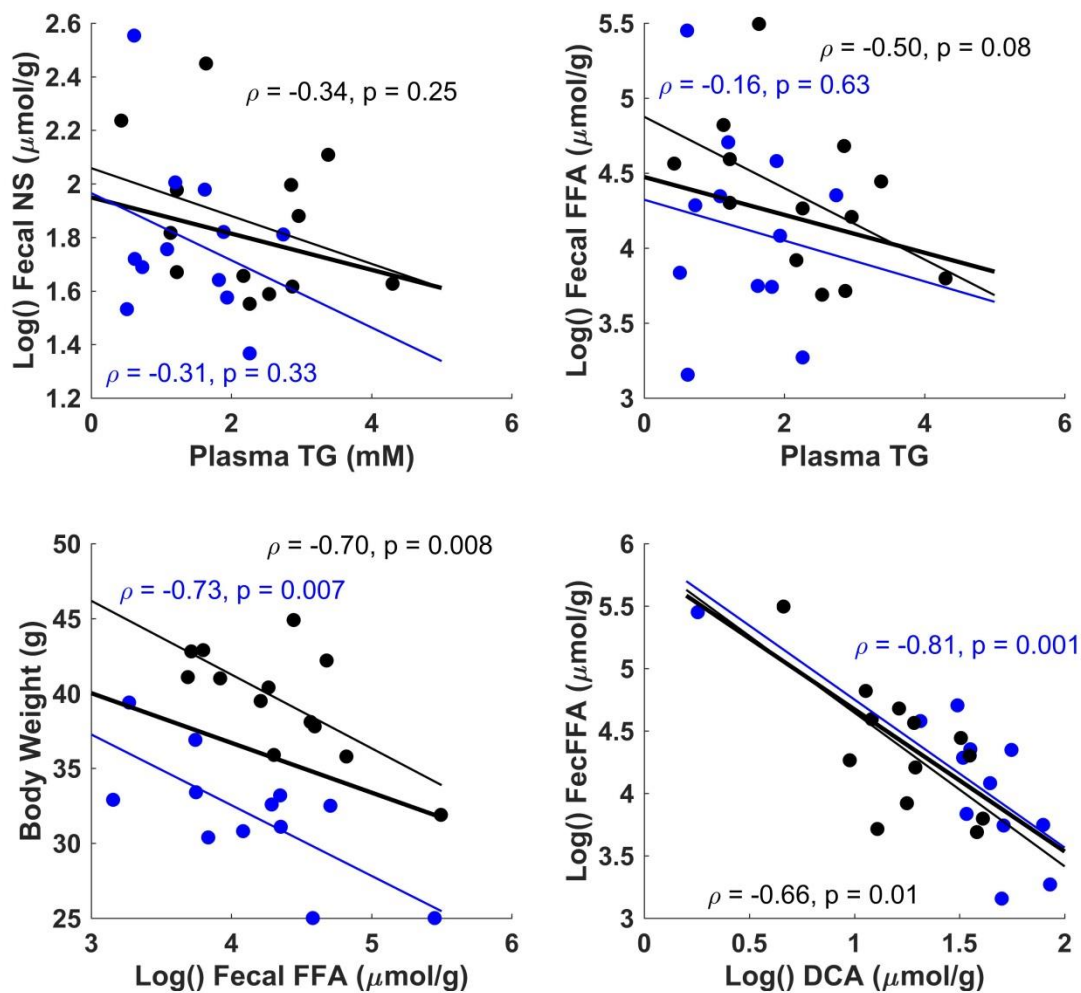

**Figure S7**

Correlations between plasma TG and fecal neutral sterols (Fecal NS) (A), plasma TG and fecal free fatty acids (FFA) (B), fecal FFA and body weight (C), and the correlation between deoxycholic acid (DCA) and fecal FFA content (D). Note the absence of correlation between plasma TG and fecal neutral sterols and the strong correlation between fecal FFA content and body weight.

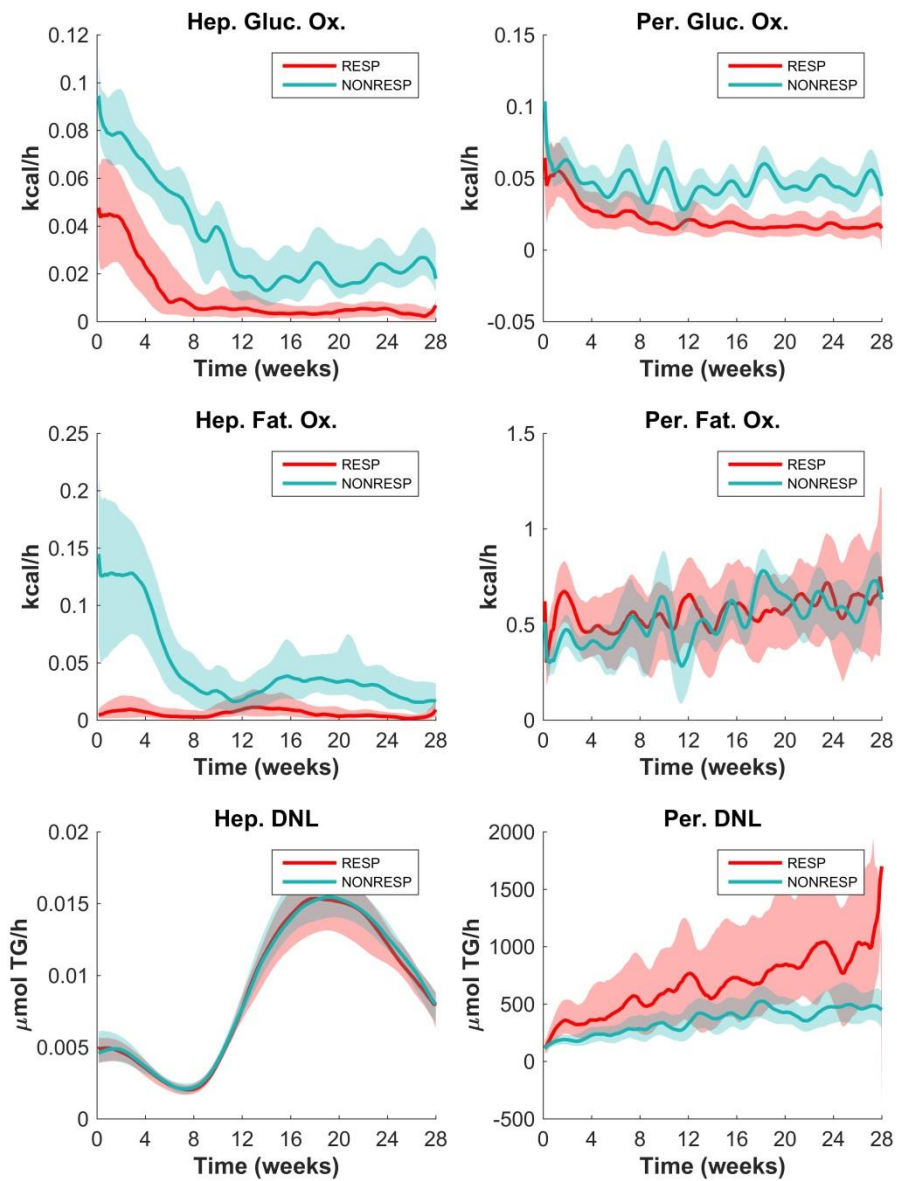

**Figure S8**

Predictions for hepatic and peripheral glucose oxidation (Hep. Gluc. Ox., Per. Gluc. Ox.), fat oxidation (Hep. Fat. Ox., Per. Fat. Ox.) and de novo lipogenesis (Hep. DNL, Per. DNL). The curve represents the median values, whereas the area around the line denotes 30% of solutions around the median.



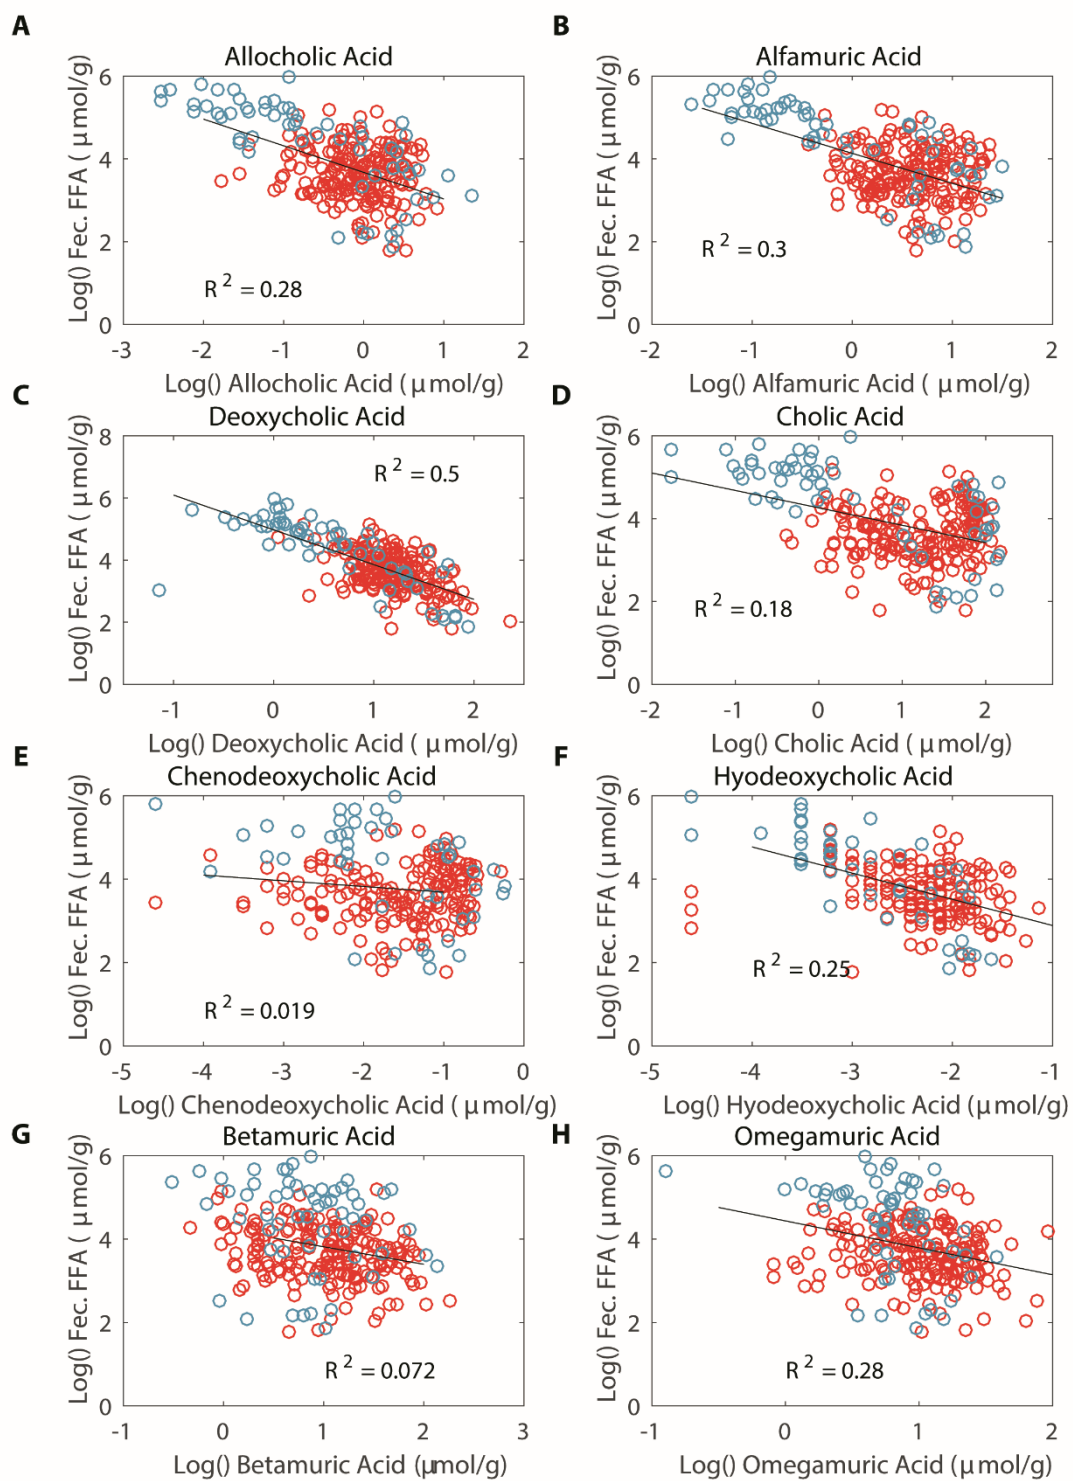

**Figure S9**

Correlations between individual bile acid species and fecal FFA concentrations irrespective of time spent on HFCD. Non-responder samples are colored in blue, and responder samples are colored in red. Note that especially the correlation between deoxycholic acid and fecal FFA is strong.

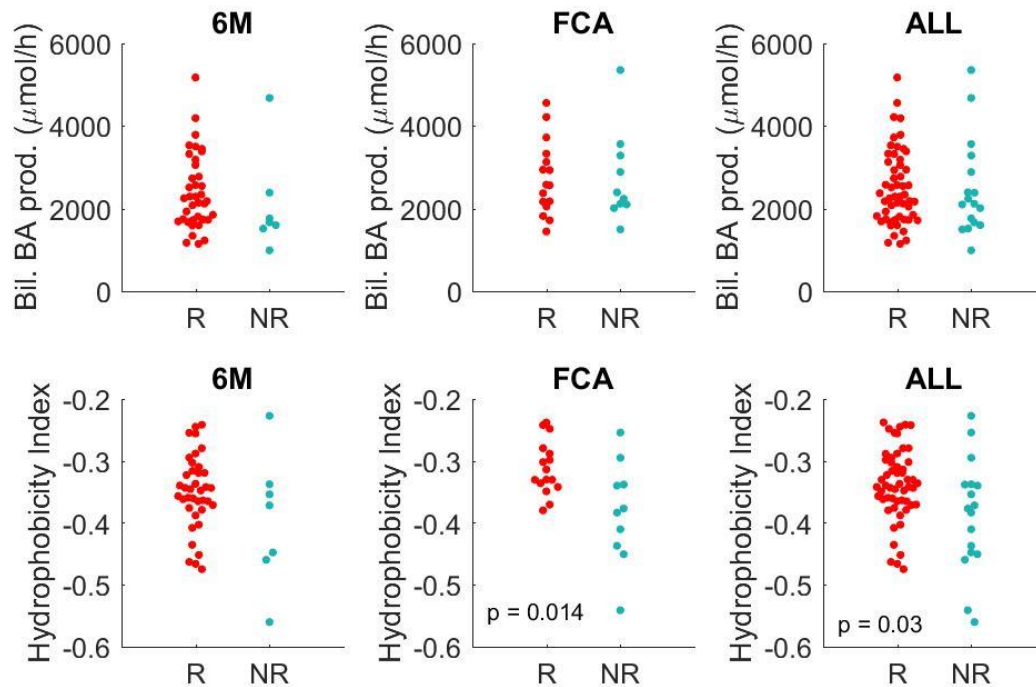

**Figure S10**

Biliary bile acid secretion rate and hydrophobicity index of biliary bile acids for cohorts followed for up to 6 months (6M), the validation cohorts used for measurement of fractional cholesterol absorption (FCA) and both together (ALL). Note how the hydrophobicity index is lower for non-responders (NR) vs. responders (R). Whenever the difference between R and NR-groups was statistically significant ( $\alpha=0.05$ ) using the Wilcoxon rank-sum test, p-values are shown.

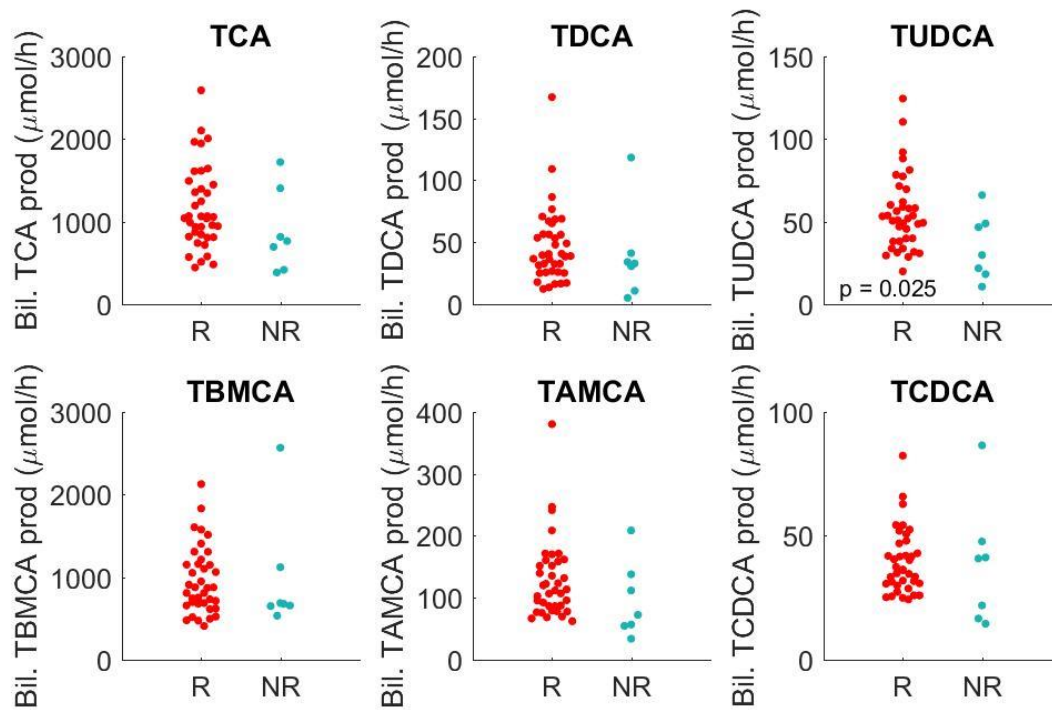

**Figure S11**

Biliary tauro-cholate (TCA), tauro-deoxycholate (TDCA), tauro-ursodeoxycholate (TUDCA), tauro-beta-muricholate (TBMCA), tauro-alpha-muricholate (TAMCA) and tauro-chenodeoxycholate (TCDCA) for responders (R) and non-responders (NR) of all mice followed for up to 6 months on HFCD. Whenever the difference between R and NR-groups was statistically significant ( $\alpha=0.05$ ) using the Wilcoxon rank-sum test, p-values are shown.



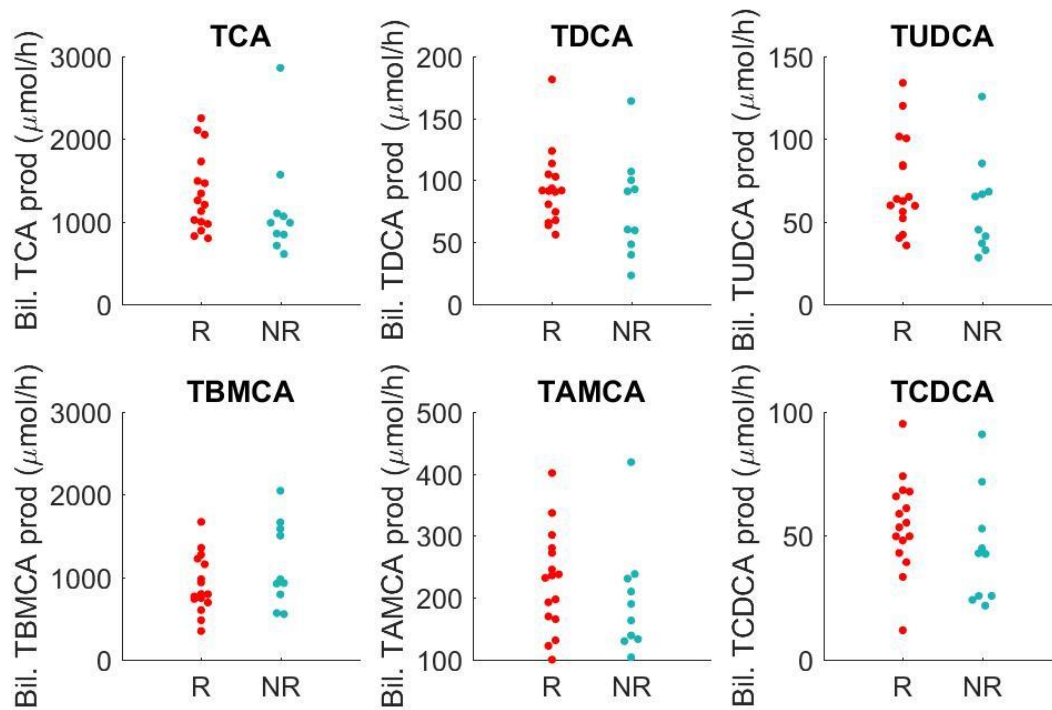

**Figure S12**

Biliary tauro-cholate (TCA), tauro-deoxycholate (TDCA), tauro-ursodeoxycholate (TUDCA), tauro-beta-muricholate (TBMCA), tauro-alpha-muricholate (TAMCA) and tauro-chenodeoxycholate (TCDCA) for responders (R) and non-responders (NR) of mice on HFCD for 2 months used for measurement of fractional cholesterol absorption. Whenever the difference between R and NR-groups was statistically significant ( $\alpha=0.05$ ) using the Wilcoxon rank-sum test, p-values are shown.

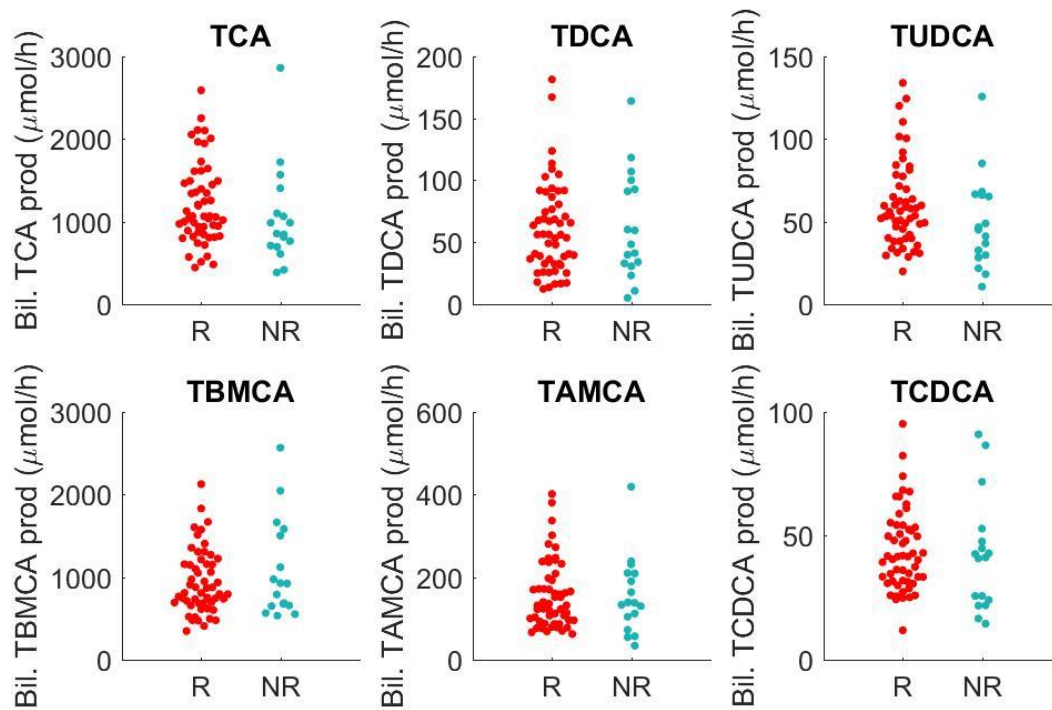

**Figure S13**

Biliary tauro-cholate (TCA), tauro-deoxycholate (TDCA), tauro-ursodeoxycholate (TUDCA), tauro-beta-muricholate (TBMCA), tauro-alpha-muricholate (TAMCA) and tauro-chenodeoxycholate (TCDCA) for responders (R) and non-responders (NR) of all mice followed for up to 6 months on HFCD and mice used for measurement of fractional cholesterol absorption after 2 months of HFCD together. Whenever the difference between R and NR-groups was statistically significant ( $\alpha=0.05$ ) using the Wilcoxon rank-sum test, p-values are shown.

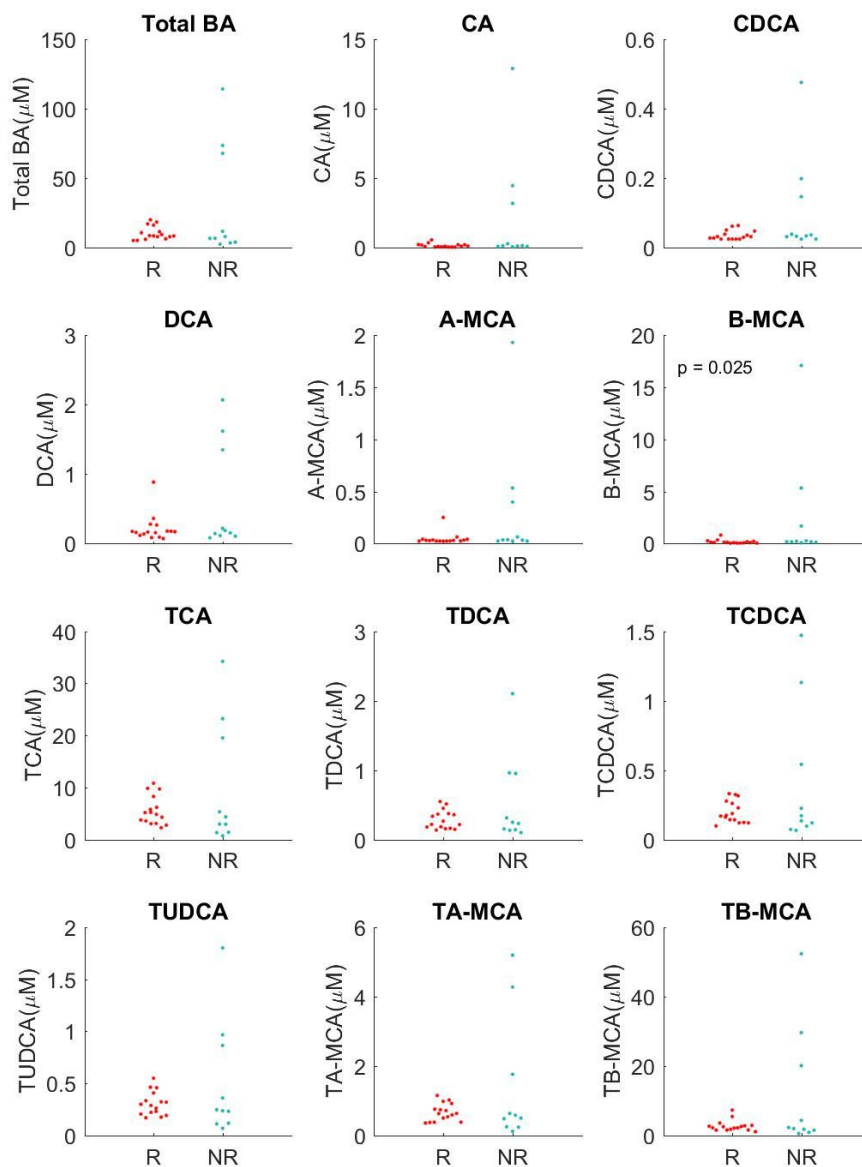

**Figure S14**

Total plasma bile acids (TBA), cholic acid (CA), chenodeoxycholic acid (CDCA), deoxycholic acid (DCA), alpha-muricholic acid (A-MCA), beta-muricholic acid (B-MCA), tauro-cholic acid (TCA), tauro-deoxycholic acid (TDCA), tauro-chenodeoxycholic acid (TCDCA), tauro-ursodeoxycholic acid (TUDCA), tauro-alpha-muricholic acid (TA-MCA), tauro-beta-muricholic acid (TB-MCA) for all mice in the longitudinal cohort followed for up to 6 months on HFCD. Whenever the difference between R and NR-groups was statistically significant ( $\alpha=0.05$ ) using the Wilcoxon rank-sum test, p-values are shown.

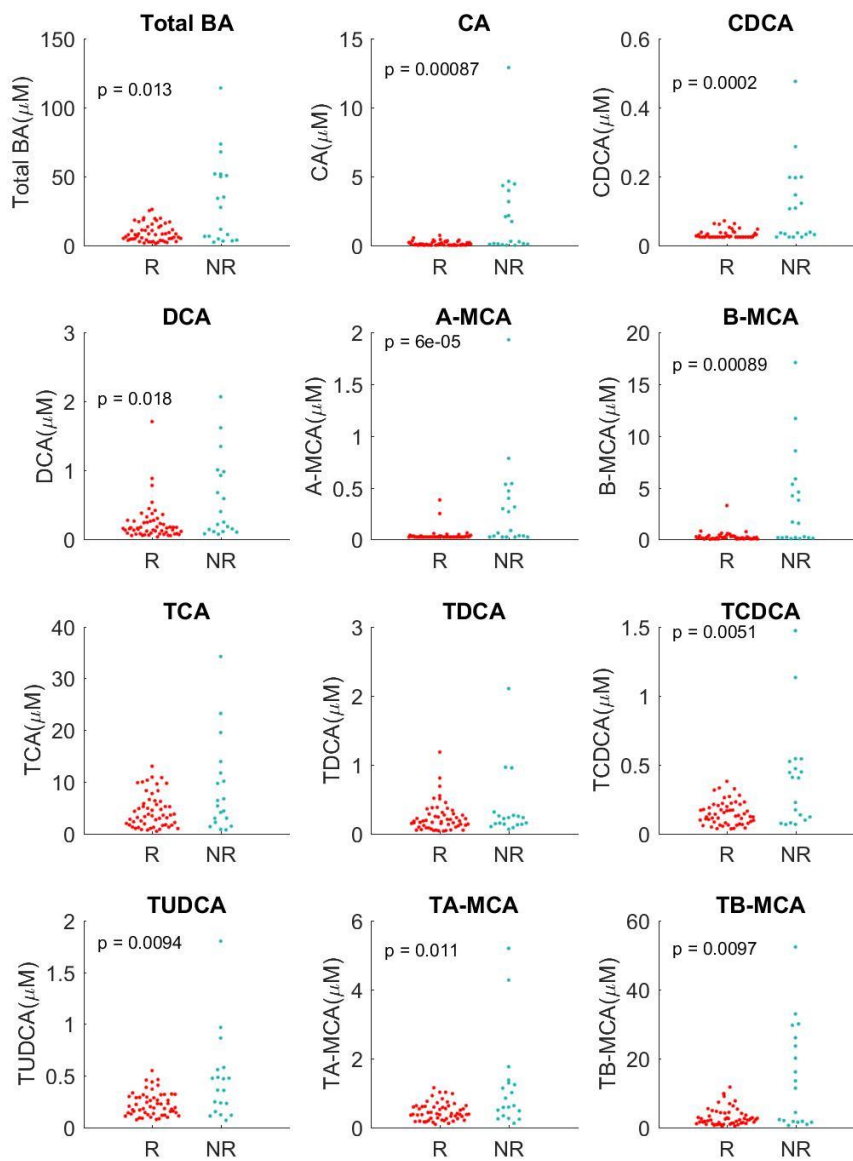

**Figure S15**

Total plasma bile acids (TBA), cholic acid (CA), chenodeoxycholic acid (CDCA), deoxycholic acid (DCA), alpha-muricholic acid (A-MCA), beta-muricholic acid (B-MCA), tauro-cholic acid (TCA), tauro-deoxycholic acid (TDCA), tauro-chenodeoxycholic acid (TCDCA), tauro-ursodeoxycholic acid (TUDCA), tauro-alpha-muricholic acid (TA-MCA), tauro-beta-muricholic acid (TB-MCA) for all animals used for measurement of fractional cholesterol absorption where mice were fed HFCD for 2 months. Whenever the difference between R and NR-groups was statistically significant ( $\alpha 0.05$ ) using the Wilcoxon rank-sum test, p-values are shown.

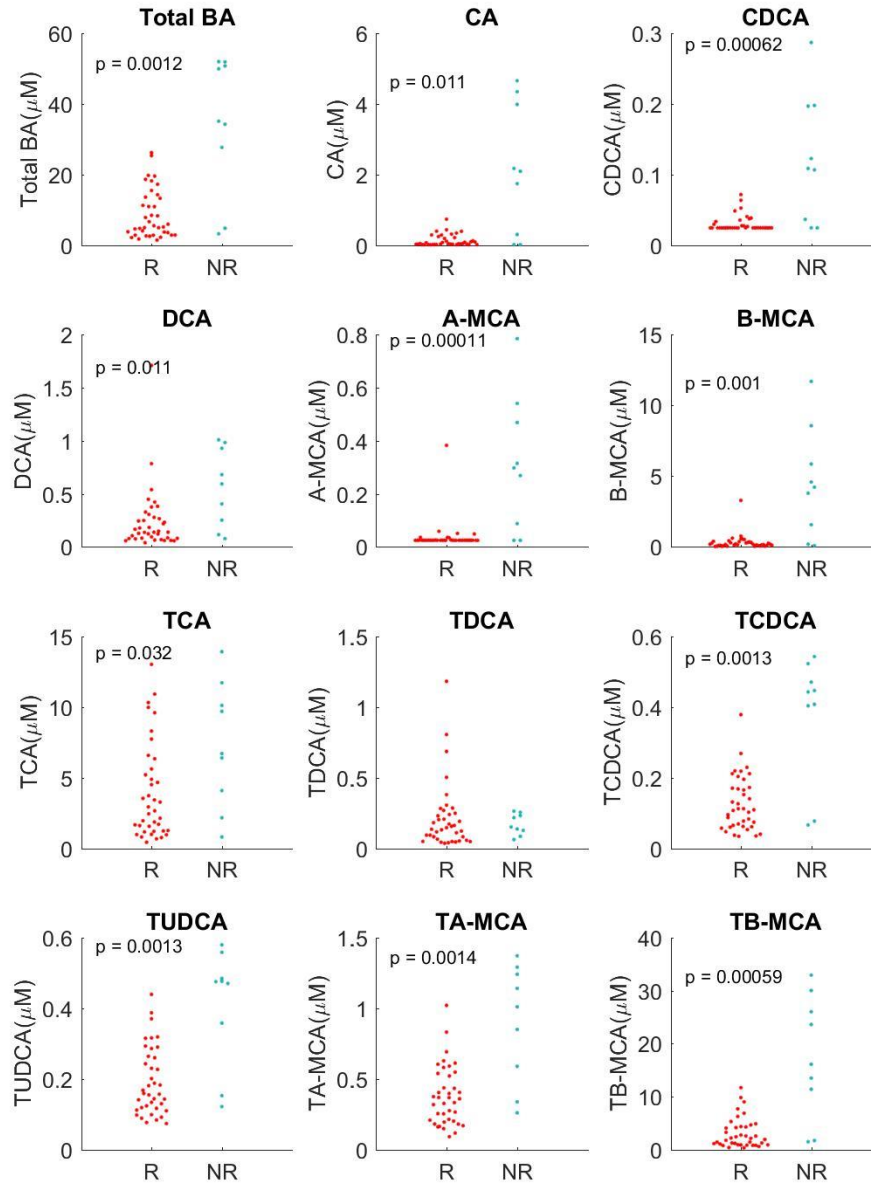

**Figure S16**

Total plasma bile acids (TBA), cholic acid (CA), chenodeoxycholic acid (CDCA), deoxycholic acid (DCA), alpha-muricholic acid (A-MCA), beta-muricholic acid (B-MCA), tauro-cholic acid (TCA), tauro-deoxycholic acid (TDCA), tauro-chenodeoxycholic acid (TCDCA), tauro-ursodeoxycholic acid (TUDCA), tauro-alpha-muricholic acid (TA-MCA), tauro-beta-muricholic acid (TB-MCA) for all animals used in the longitudinal (6 moths) cohort and validation study together. Whenever the difference between R and NR-groups was statistically significant ( $\alpha = 0.05$ ) using the Wilcoxon rank-sum test, p-values are shown.
